# Supplementary material
Source: PubMed Central journal article supplement (PMC3816002)

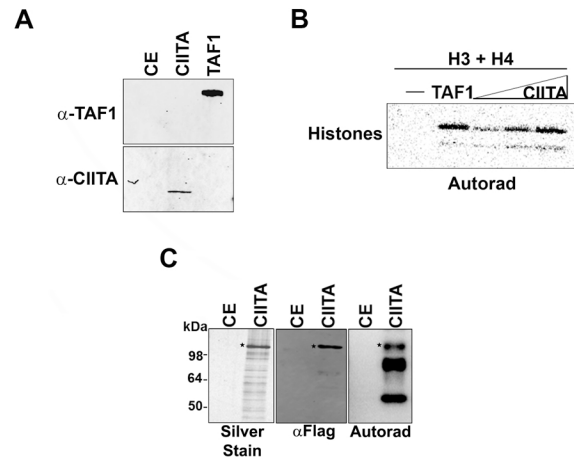

Sup Fig S1

Supplement: NIHMS524917-supplement-02.pdf [file NIHMS524917-supplement-02.pdf]

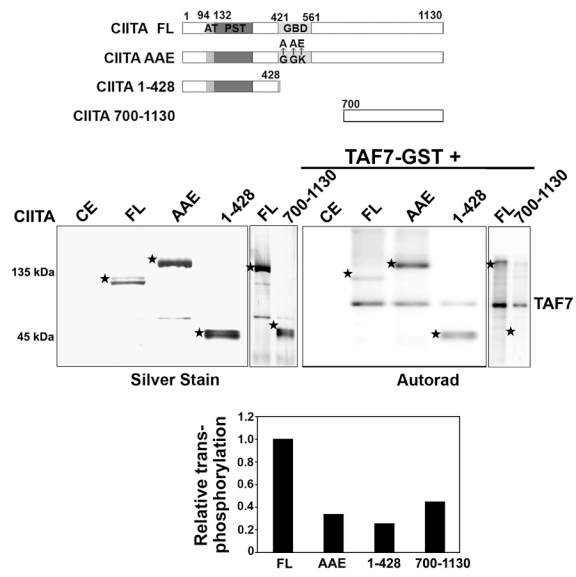

Sup Fig. S2

Supplement: NIHMS524917-supplement-03.pdf [file NIHMS524917-supplement-03.pdf]

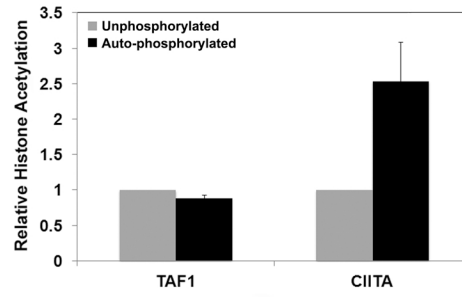

**Sup Fig. S3**

Supplement: NIHMS524917-supplement-04.pdf [file NIHMS524917-supplement-04.pdf]

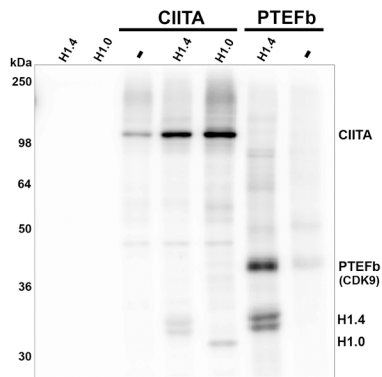

Sup Fig. S4

Supplement: NIHMS524917-supplement-05.pdf [file NIHMS524917-supplement-05.pdf]

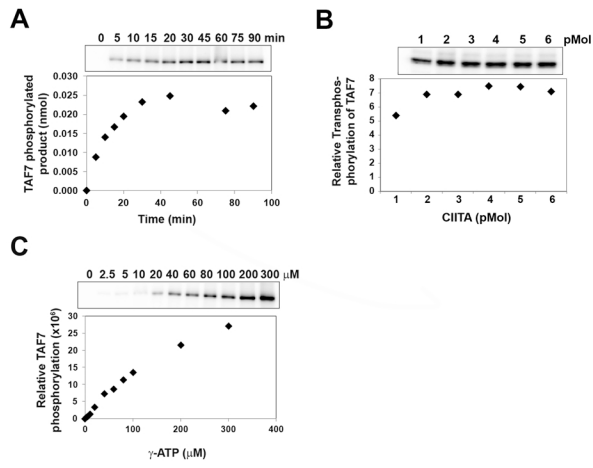

Sup Fig S5

Supplement: NIHMS524917-supplement-06.pdf [file NIHMS524917-supplement-06.pdf]
